# Supplementary material
Source: PubMed Central journal article supplement (PMC8982582)
Supplement: EMBR-23-e53684-s002.pdf [file EMBR-23-e53684-s002.pdf]

## Expanded View Figures

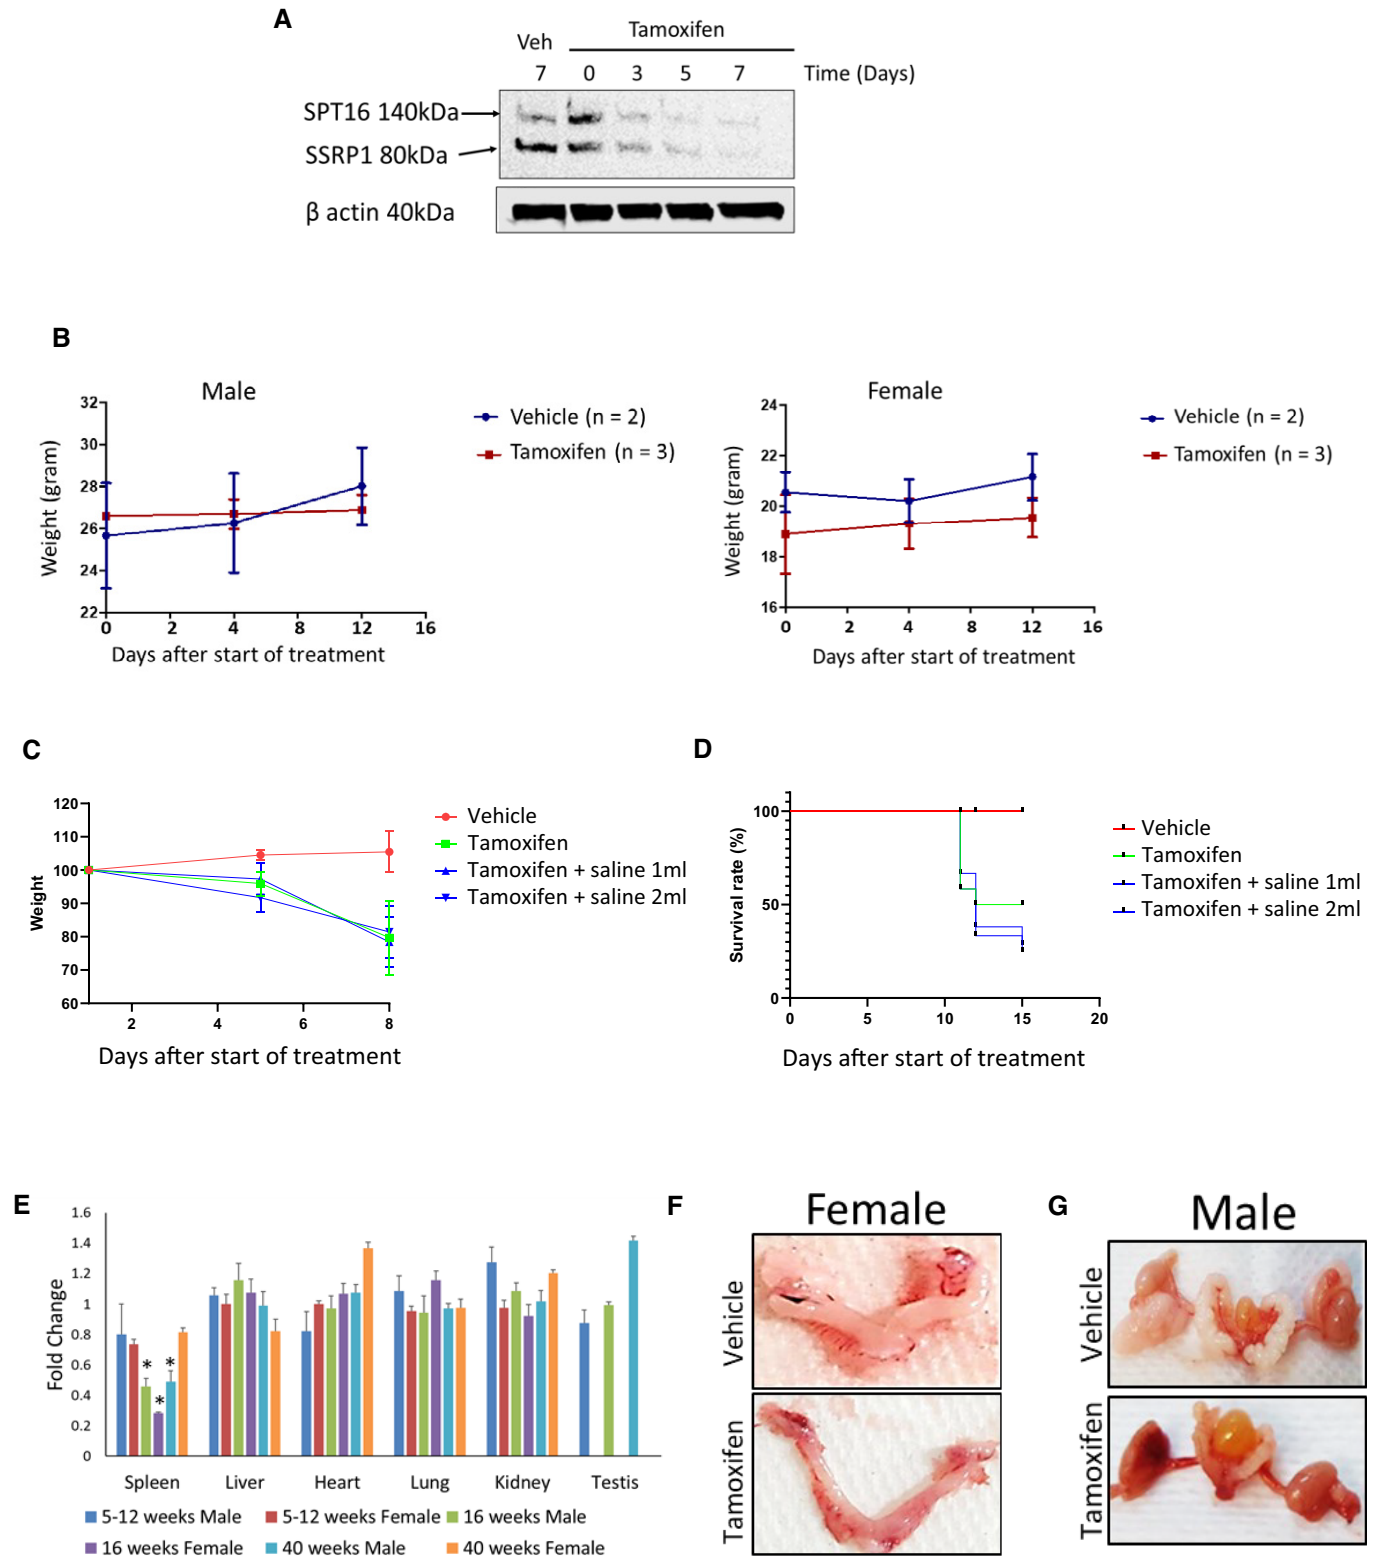

Figure EV1.

**Figure EV1. Effect of tamoxifen administration on mice with wild type or floxed *Ssrp1* alleles.**

- A Kinetic of FACT protein subunit loss in spleen of *Ssrp1<sup>fl/fl</sup>*; *CreER<sup>T2+/+</sup>* mice upon tamoxifen administration. Western blotting of total protein extracts of spleen collected from mice at indicated time points. Veh is vehicle.
- B Kinetic of weight changes of *Ssrp1<sup>+/+</sup>*; *CreER<sup>T2+/+</sup>* mice upon tamoxifen administration. Mean  $\pm$  SD for tamoxifen treated mice and mean  $\pm$  range for vehicle treated mice.
- C Effect of rehydration on weight of *Ssrp1<sup>+/+</sup>*; *CreER<sup>T2+/+</sup>* mice treated with vehicle or tamoxifen. Kinetic of weight loss in control and tamoxifen treated animals either provided with subcutaneous saline injection (1 or 2 ml/day) or not. Mean  $\pm$  SD,  $n = 3$ .
- D Effect of rehydration on survival of *Ssrp1<sup>+/+</sup>*; *CreER<sup>T2+/+</sup>* mice treated with vehicle or tamoxifen. Kaplan-Mayer curves of control and tamoxifen treated groups either provided with subcutaneous saline injection (1 or 2 ml/day) or not.  $n = 3$ .
- E Changes in organ weight in *Ssrp1<sup>fl/fl</sup>*; *CreER<sup>T2+/+</sup>* mice treated with tamoxifen versus vehicle treated animals. Mean  $\pm$  SD. \* $P$ -value  $< 0.05$ .  $n = 5$ .
- F, G Representative photographs of female (F) and male (G) reproductive organs excised from vehicle and tamoxifen treated mice.

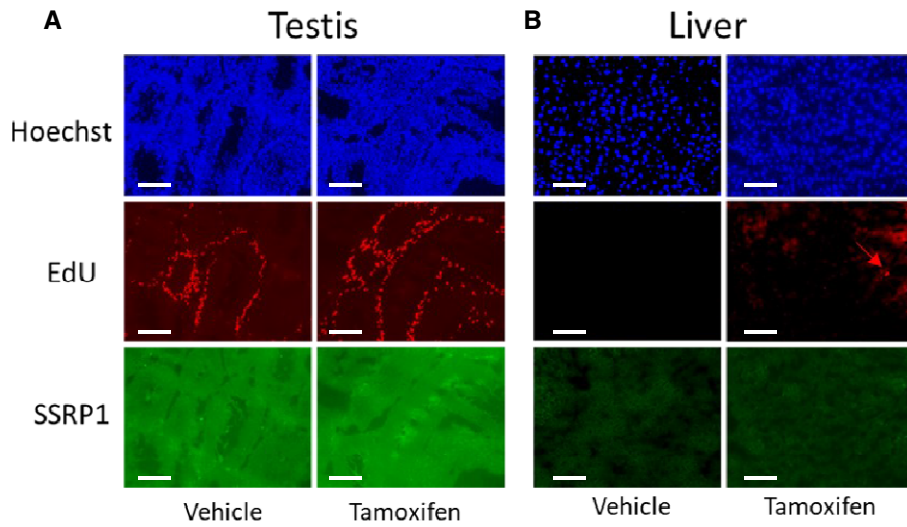

**Figure EV2. Effect of FACT loss on DNA replication and apoptosis in mouse organs.**

A, B Effect of tamoxifen administration to *Ssrp1<sup>fl/fl</sup>; CreER<sup>T2/+</sup>* mice on replication in testis (A) and liver (B). EdU was given to mice 3 days after stop of tamoxifen treatment for 1 h followed by organ isolation and staining for total DNA (Hoechst), EdU and SSRP1. Red arrow indicates EdU positive nucleus in liver. Scale bars – 100 μm.

C Staining of sections of several organs of in *Ssrp1<sup>fl/fl</sup>; CreER<sup>T2/+</sup>* mice for cleaved caspase 3, 3 days after stop of treatment with tamoxifen or vehicle.

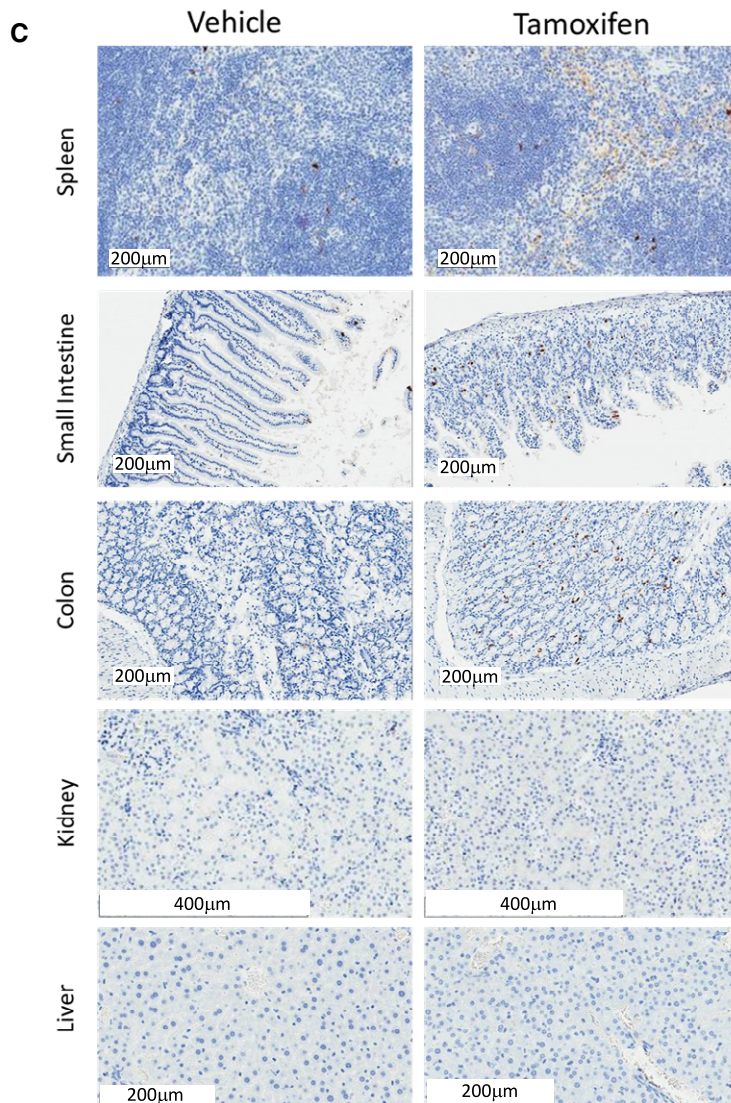

**Figure EV3. Analyses of scRNA sequencing of bone marrow and intestine of in *Ssrp1<sup>fl/fl</sup>*; *CreER<sup>T2+/+</sup>* mice next day after stop of treatment with vehicle or tamoxifen.**

- A Comparison of the numbers of sequenced cells, mean reads per cell and mean identified genes between samples.
- B Dot plots showing the number of features (nFeature\_RNA, the number of genes detected in each cell), RNA molecules (nCount\_RNA, the total number of molecules detected within a cell) and proportion of reads corresponding to mitochondrial RNA (percent.mt) in each sample.
- C Overlapped UMAP plots of bone marrow and intestinal samples color coded according to the treatment type.
- D, E UMAP plots of bone marrow (D) and intestine (E) color-coded based on the expression of markers of cell cycle.

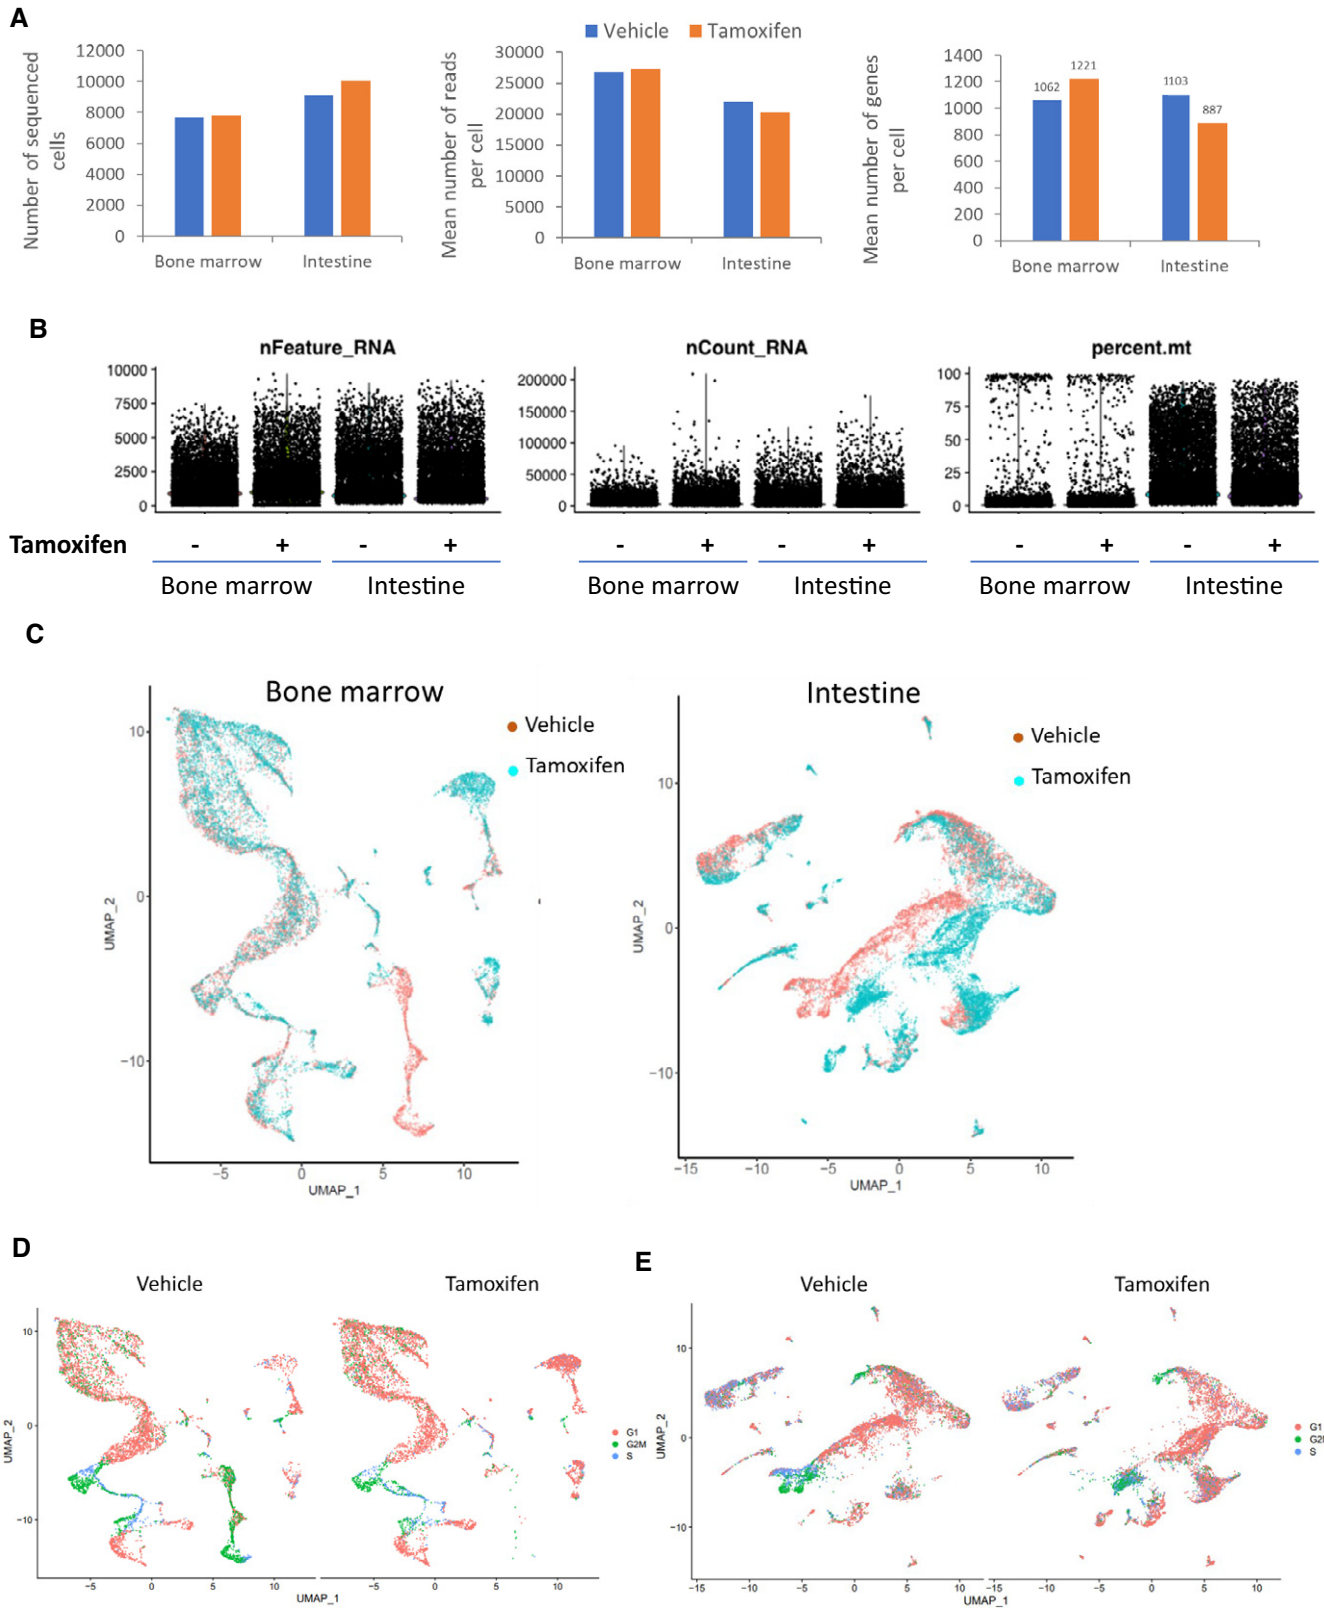

Figure EV3.

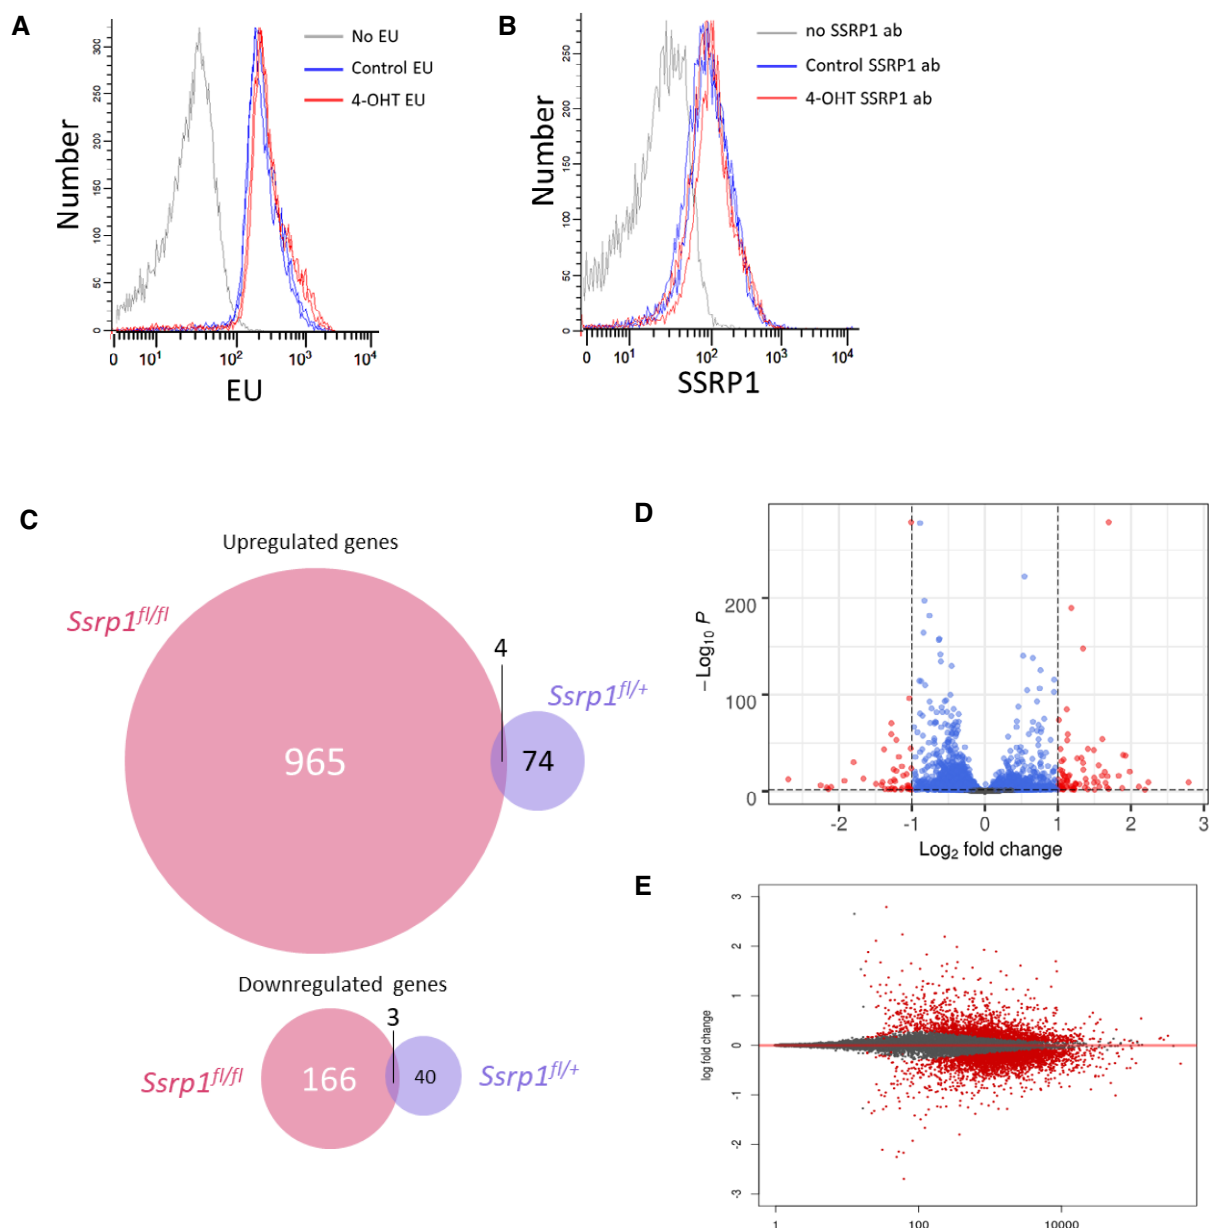

**Figure EV4. Comparison of changes in transcription in MSC of two genotypes treated with vehicle or 4-OHT for 5 days and then split and analyzed 24 h after.**

A, B EU incorporation assay (30 min) (A) and staining with SSRP1 antibody (B) of *Ssrp1<sup>fl/+</sup>; CreER<sup>T2</sup>/+* MSC. Two replicates are shown.

C–E Data of RNA-seq experiment with two replicates of MSC. C. Venn diagrams showing number of up- and downregulated genes in homo- and heterozygous cells. D. Volcano plot of gene expression changes in heterozygous cells upon 4-OHT treatment. E. MA plot of gene expression changes in heterozygous cells upon 4-OHT treatment.

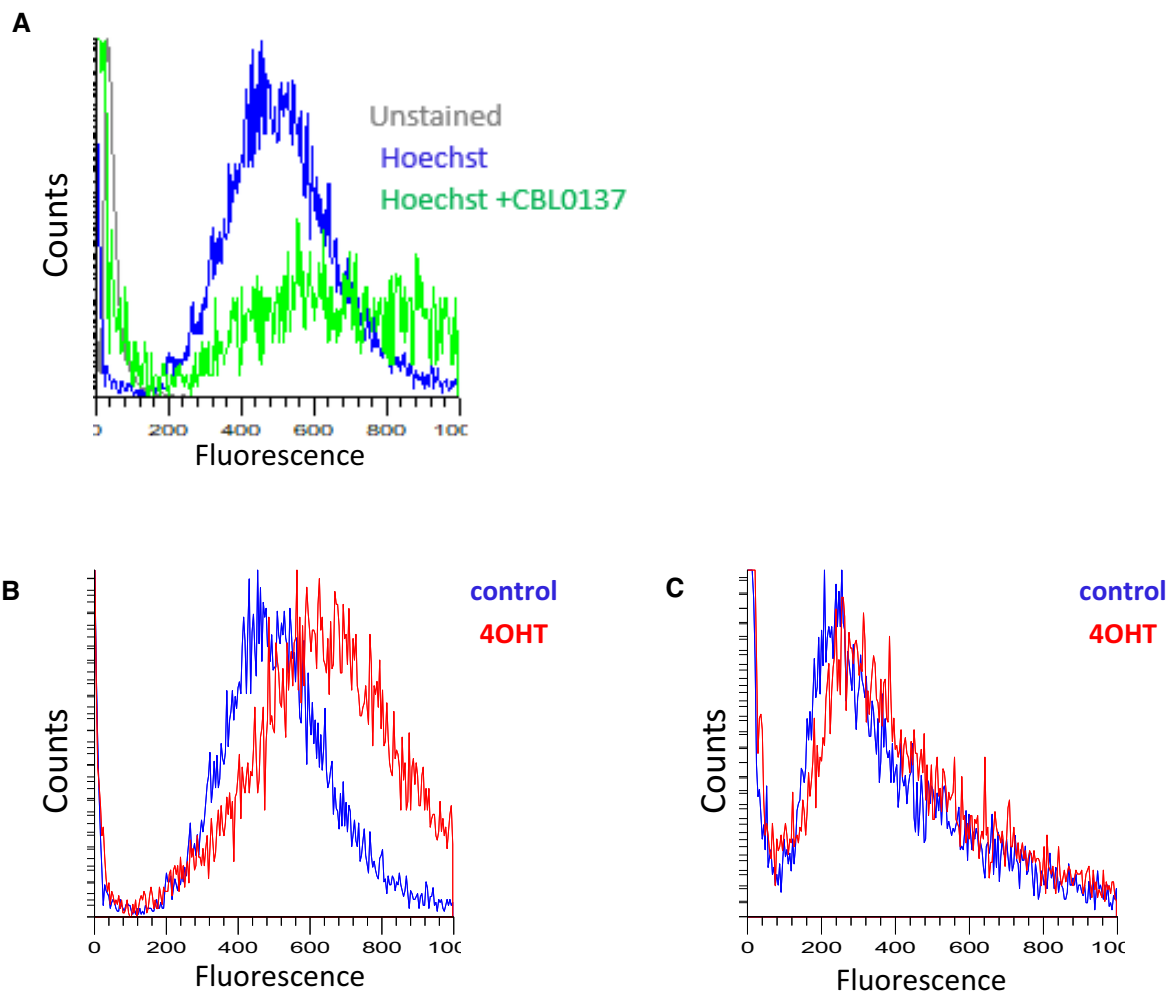

**Figure EV5. Assessment of general chromatin accessibility by staining DNA in live cells with Hoechst 33342. Histograms of fluorescent intensity of MSC stained with 3  $\mu$ M of Hoechst 33342 for 15 min.**

A After incubation with CBL0137 (1  $\mu$ M) for 30 min. This plot also includes overlap of histogram of negative control (cells unstained with Hoechst).

B *Ssrp1*<sup>β/β</sup>; *CreER*<sup>T2+/+</sup> cells untreated or treated with 4OHT.

C *Ssrp1*<sup>β/+</sup>; *CreER*<sup>T2+/-</sup> cells untreated or treated with 4OHT.
